# Supplementary material for: Pharmacological targeting of TNS3 with histone deacetylase inhibitor as a therapeutic strategy in esophageal squamous cell carcinoma
Source: Aging (Albany NY). 2021 May 28;13(11):15336–52. doi: 10.18632/aging.203091 (PMC8221360; doi:10.18632/aging.203091)
Supplement: Supplementary Table 5 [file aging-13-203091-s004.xlsx]

## Sheet: Sheet1
Supplementary Table 5. The clinical features of ESCC patients shown in Figure 4A.
id	status	time	age	gender	location	invasion	lymph_nodes	metastasis	cTNM	histopathology	ihc_score	expression
1	0	56	75	1	3	3	0	0	2	2	3	2
2	1	28	66	2	3	3	0	0	2	2	1	1
3	0	60	64	1	2	2	0	0	2	1	3	2
4	0	13	60	1	2	2	0	0	2	3	3	2
5	0	57	77	1	3	1	0	0	1	1	1	1
6	0	60	60	1	2	3	1	0	3	2	4	2
7	1	32	73	1	2	2	1	0	2	1	2	1
8	0	55	69	1	2	2	1	0	2	2	2	1
9	0	31	70	2	2	1	1	0	1	1	2	1
10	1	41	73	1	3	1	1	0	1	1	2	1
11	1	55	68	1	2	2	1	0	2	2	3	2
12	0	28	70	1	1	3	1	0	3	2	2	1
13	0	41	57	2	2	1	2	0	3	2	2	1
14	1	55	83	2	1	2	1	0	2	1	2	1
15	0	44	70	2	2	3	1	0	3	3	3	2
16	0	24	56	1	2	3	1	0	3	2	2	1
17	1	16	68	2	1	3	1	0	3	3	4	2
18	0	41	64	1	2	1	1	0	1	2	2	1
19	1	24	71	2	2	4	1	0	4	3	4	2
20	0	39	69	1	1	2	1	0	2	2	2	1
21	0	54	74	1	2	1	1	0	1	2	4	2
22	1	55	68	1	3	3	1	0	3	3	3	2
23	0	15	55	2	2	3	0	0	2	3	3	2
24	1	34	76	1	2	3	1	0	3	3	4	2
25	0	37	69	1	3	2	1	0	2	2	2	1
26	1	16	73	2	2	2	0	0	2	2	3	2
27	1	28	64	2	3	3	1	0	3	3	3	2
28	0	58	45	1	1	3	1	0	3	2	2	1
29	0	44	58	2	1	1	0	0	1	1	2	1
30	1	38	53	1	2	1	0	0	1	3	3	2
31	1	17	69	1	1	2	1	0	2	2	2	1
32	0	51	69	1	2	1	0	0	1	2	2	1
33	0	60	72	2	2	3	0	0	2	2	2	1
34	0	55	66	1	3	3	0	0	2	2	2	1
35	0	60	75	1	1	3	2	0	3	3	3	2
36	0	26	72	1	2	3	1	0	3	3	4	2
37	0	60	88	2	2	2	0	0	2	3	2	1
38	0	48	66	1	3	1	0	0	1	1	1	1
39	0	60	53	2	2	3	1	0	3	2	4	2
40	1	52	74	1	2	3	1	0	3	3	3	2
41	1	56	57	1	2	2	0	0	2	1	2	1
42	1	1	62	1	2	3	1	0	3	3	3	2
43	1	19	66	1	2	3	1	0	3	2	3	2
44	0	16	66	1	2	2	0	0	2	1	2	1
45	0	60	44	1	2	2	1	0	2	2	3	2
46	0	58	69	1	2	3	0	0	2	2	3	2
47	0	47	48	1	1	2	1	0	2	2	3	2
48	0	56	67	1	2	1	0	0	1	2	1	1
49	0	18	50	1	1	3	0	0	2	1	2	1
50	0	55	50	1	3	3	0	0	2	2	2	1
51	0	55	47	2	2	3	0	0	2	2	3	2
52	0	58	58	1	3	2	0	0	2	2	2	1
53	0	29	61	2	3	3	0	0	2	2	2	1
54	1	13	56	1	2	2	1	0	2	2	2	1
55	1	28	59	1	2	4	1	0	4	3	4	2
56	0	22	65	1	2	3	2	0	2	3	3	2
57	1	13	44	1	2	4	1	0	4	3	4	2
58	0	31	68	1	1	2	1	0	2	2	3	2
59	1	32	66	2	1	3	1	0	3	2	3	2
60	0	59	57	1	3	2	1	0	2	2	3	2
61	1	57	68	2	1	2	1	0	2	2	3	2
62	0	31	55	1	3	2	1	0	2	2	3	2
63	0	37	68	1	2	2	0	0	2	2	1	1
64	0	18	60	2	1	3	1	0	3	3	4	2
65	1	12	60	2	3	3	1	0	3	3	4	2
66	0	60	65	1	3	2	1	0	2	2	2	1
67	1	52	58	1	2	3	0	0	2	2	2	1
68	0	40	65	2	2	2	1	0	1	2	4	2
69	0	58	69	2	3	1	0	0	1	1	1	1
70	1	23	62	1	3	3	2	0	3	2	3	2
71	1	30	69	2	2	3	1	0	3	3	4	2
72	0	34	66	2	2	3	0	0	2	2	1	1
73	0	51	46	2	2	1	0	0	1	1	2	1
74	0	27	65	1	2	1	0	0	1	1	2	1
75	1	28	64	1	3	2	0	0	2	2	2	1
76	0	54	67	2	2	1	1	0	1	2	4	2
77	1	33	59	1	1	2	0	0	2	2	2	1
78	0	59	69	2	1	3	0	0	2	2	2	1
79	1	30	55	1	3	3	1	0	3	2	3	2
80	0	59	65	1	2	1	0	0	1	2	2	1
81	0	55	59	2	2	3	1	0	3	3	2	1
82	1	53	72	1	3	3	1	0	3	2	1	1
83	1	48	65	2	2	3	1	0	3	2	4	2
84	1	48	64	1	2	2	0	0	2	2	3	2
85	1	54	71	2	2	3	1	0	3	3	4	2
86	0	48	38	1	3	2	1	0	2	2	4	2
87	0	55	60	1	2	3	0	0	2	3	2	1
88	0	44	51	1	3	1	0	0	1	1	2	1
89	0	56	65	1	2	2	1	0	2	2	2	1
90	1	59	54	1	1	2	1	0	2	1	2	1
91	1	45	70	2	3	3	0	0	2	2	1	1
92	0	48	68	2	3	1	0	0	1	1	1	1
93	0	60	66	1	2	3	2	0	3	2	4	2
94	0	26	56	1	2	2	0	0	2	1	2	1
95	0	28	69	2	1	2	0	0	2	3	2	1
96	1	44	67	2	2	3	1	0	3	2	1	1
97	1	46	68	1	3	4	1	0	4	2	1	1
98	0	29	64	2	3	3	0	0	2	1	2	1
99	1	22	58	2	3	3	0	0	2	3	2	1
100	0	10	77	1	2	2	1	0	2	2	3	2
101	0	60	70	1	2	1	0	0	1	2	1	1
102	0	56	59	1	3	3	1	0	3	2	3	2
103	0	57	71	1	2	3	1	0	3	2	3	2
104	0	60	66	2	2	3	0	0	2	1	1	1
105	1	39	71	1	2	3	0	0	2	2	1	1
106	0	23	52	1	3	1	1	0	1	2	3	2
107	1	35	55	2	2	1	1	0	1	3	2	1
108	0	39	59	2	3	2	2	0	3	2	3	2
109	0	60	59	1	2	2	0	0	2	2	2	1
110	0	47	66	1	2	3	0	0	2	1	2	1
111	0	52	75	1	2	1	2	0	3	2	2	1
112	1	12	59	2	3	3	2	0	3	2	4	2
113	0	44	66	1	1	2	0	0	2	1	2	1
114	0	60	57	1	2	2	1	0	2	3	2	1
115	1	43	61	2	2	2	0	0	2	3	3	2
116	0	36	65	1	2	1	0	0	1	1	2	1
117	0	35	66	1	3	3	1	0	3	3	3	2
118	0	59	64	1	3	3	1	0	3	2	2	1
119	0	16	57	1	1	3	0	0	2	3	3	2
120	0	59	58	1	3	2	1	0	2	2	2	1
121	0	59	51	2	3	3	0	0	2	2	2	1
122	1	33	53	2	2	3	0	0	2	2	3	2
123	0	39	71	1	3	2	1	0	2	2	1	1
124	0	34	73	2	3	2	1	0	2	3	3	2
125	0	55	61	2	2	3	0	0	2	2	4	2
126	1	56	72	2	1	3	1	0	3	3	4	2
127	0	59	67	2	1	1	0	0	1	1	1	1
128	0	33	51	1	2	2	1	0	2	2	2	1
129	0	55	64	1	1	2	1	0	2	3	3	2
130	1	39	66	2	1	3	0	0	2	2	1	1
131	1	57	60	1	1	2	2	0	3	3	4	2
132	0	55	74	1	2	2	1	0	2	2	1	1
133	0	49	69	1	2	3	1	0	3	3	3	2
134	1	34	64	1	2	2	2	0	3	2	3	2
135	1	47	53	1	3	2	1	0	2	2	3	2
136	0	58	64	1	2	2	0	0	2	1	2	1
137	1	18	47	1	1	2	1	0	2	1	2	1
138	0	58	72	1	3	2	1	0	2	2	2	1
139	0	55	44	1	2	2	1	0	2	2	3	2
140	0	27	63	1	2	2	0	0	2	2	3	2
141	1	37	68	1	2	3	1	0	3	2	2	1
142	1	2	68	1	2	3	3	0	4	2	3	2
143	0	57	70	1	3	3	1	0	3	2	3	2
144	0	22	52	1	1	3	1	0	3	2	3	2
145	0	27	69	1	2	2	1	0	2	2	2	1
146	1	19	70	1	1	2	1	0	2	1	3	2
147	0	44	71	1	3	3	1	0	3	1	2	1
148	1	21	65	2	2	3	1	0	3	3	4	2
149	1	13	61	1	2	2	1	0	2	2	2	1
150	0	41	86	2	1	2	1	0	2	3	2	1
151	0	34	63	1	2	2	1	0	2	2	3	2
152	0	38	65	2	2	2	1	0	2	2	2	1
153	1	1	63	2	3	3	2	0	3	3	3	2
